# Supplementary material
Source: publisher figshare collection journal article supplement (https://tandf.figshare.com/articles/dataset/_/13607710)

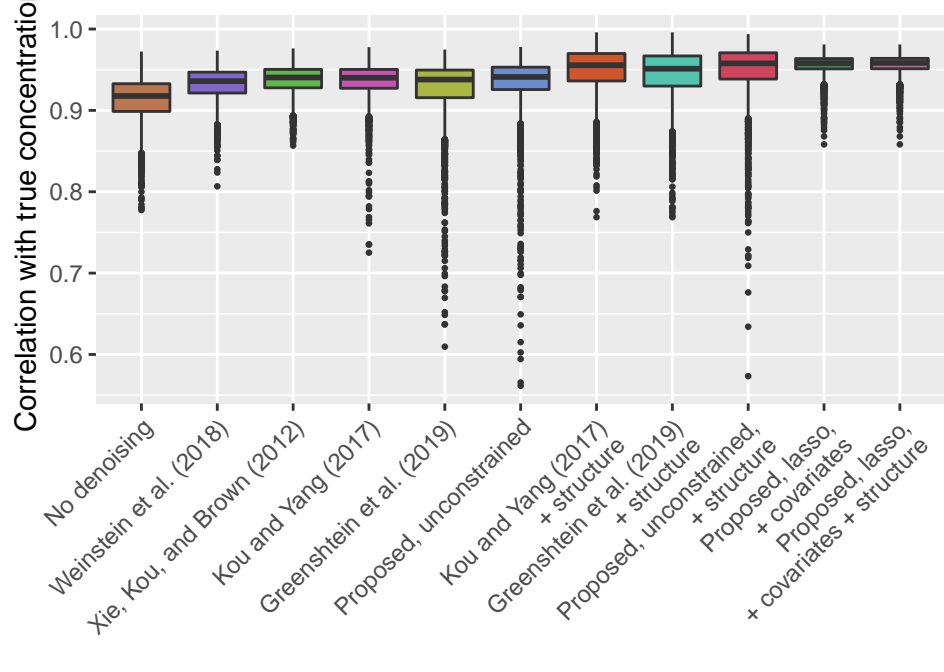

Supplement: Supplementary file 1 [file 2]

# Setting III, $m = 100$

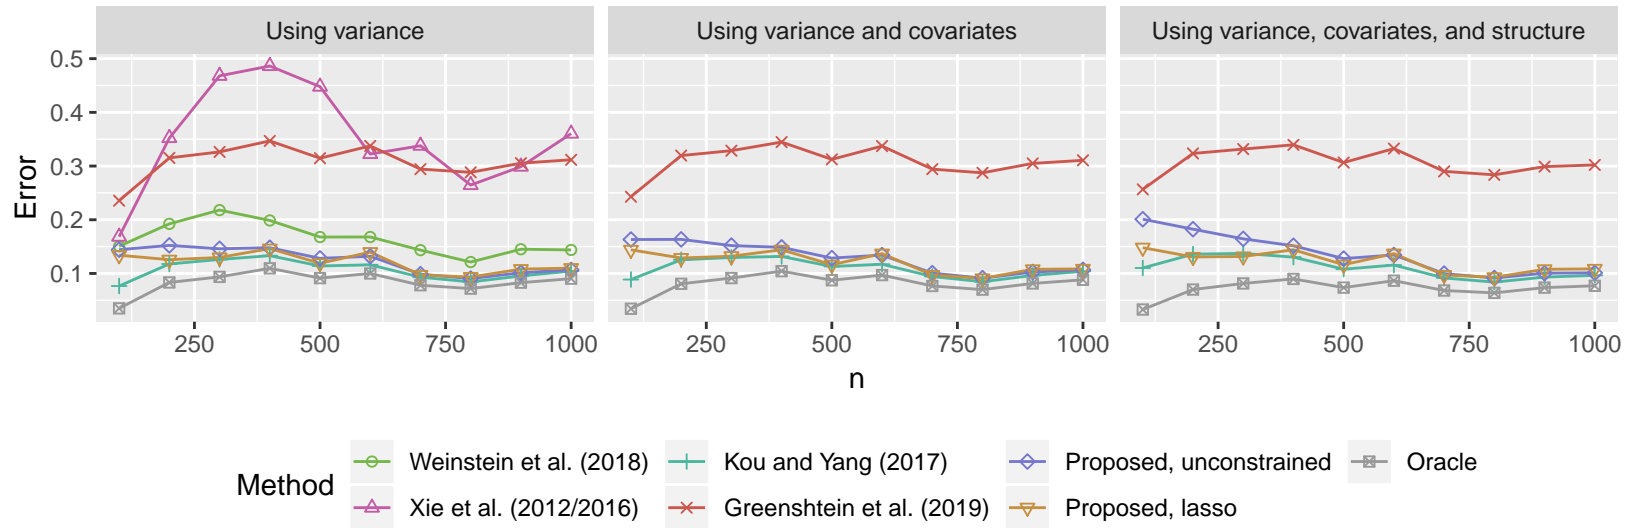

Supplement: Supplementary file 3 [file 2]

## Setting II

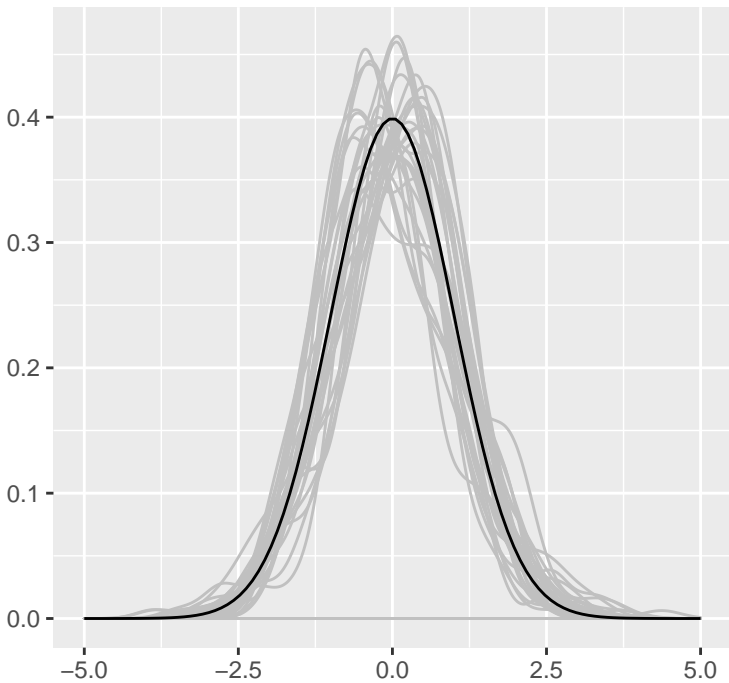

Supplement: Supplementary file 4 [file 2]

# Setting I

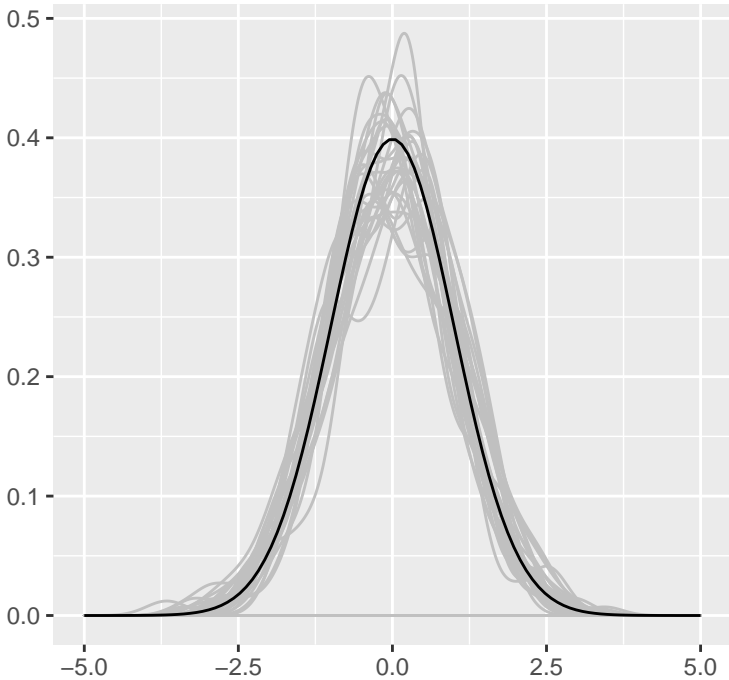

Supplement: Supplementary file 5 [file 2]

## Setting II

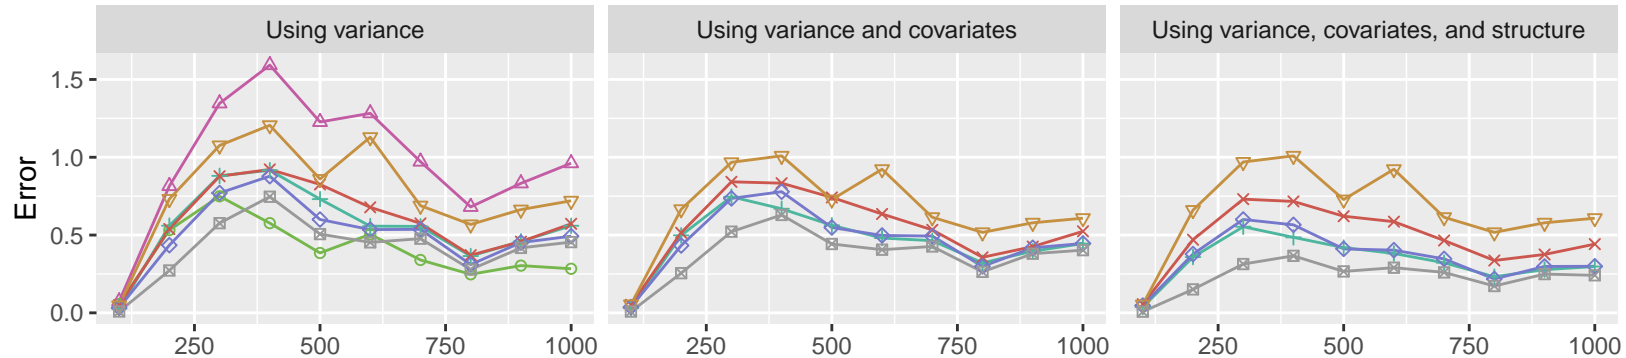

Supplement: Supplementary file 6 [file 2]

# Setting III, $m = 10$

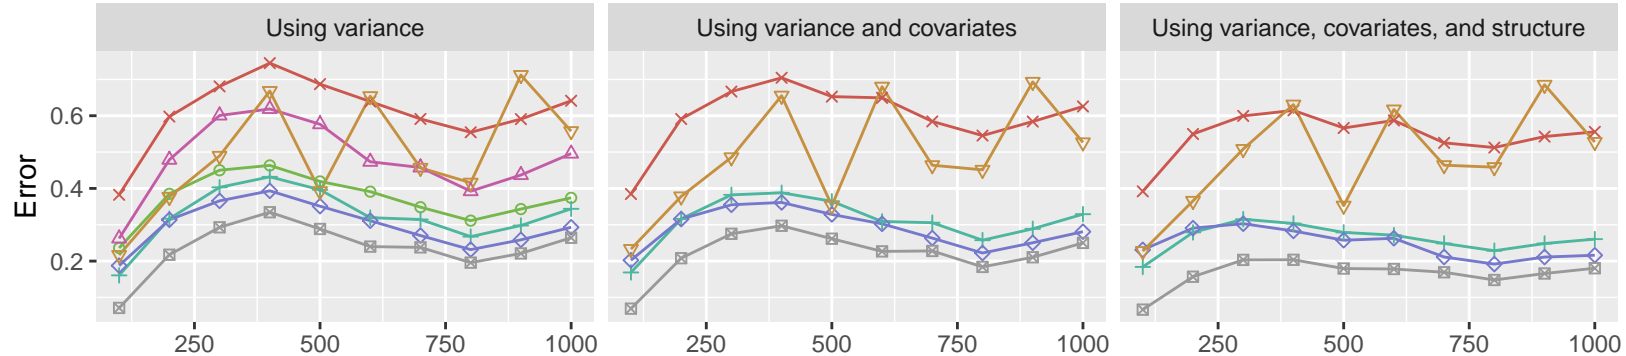

Supplement: Supplementary file 7 [file 2]

# Setting I

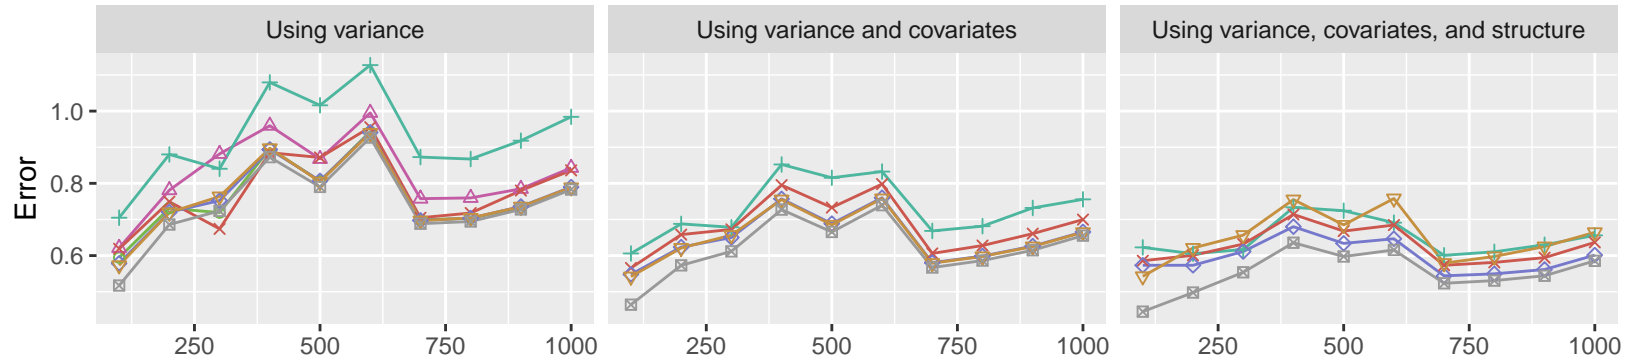

Supplement: Supplementary file 8 [file 2]
